# Supplementary material
Source: PubMed Central journal article supplement (PMC5369501)

# Appendices

## Appendix I

### DIAGNOSIS OF IRRITABLE BOWEL SYNDROME

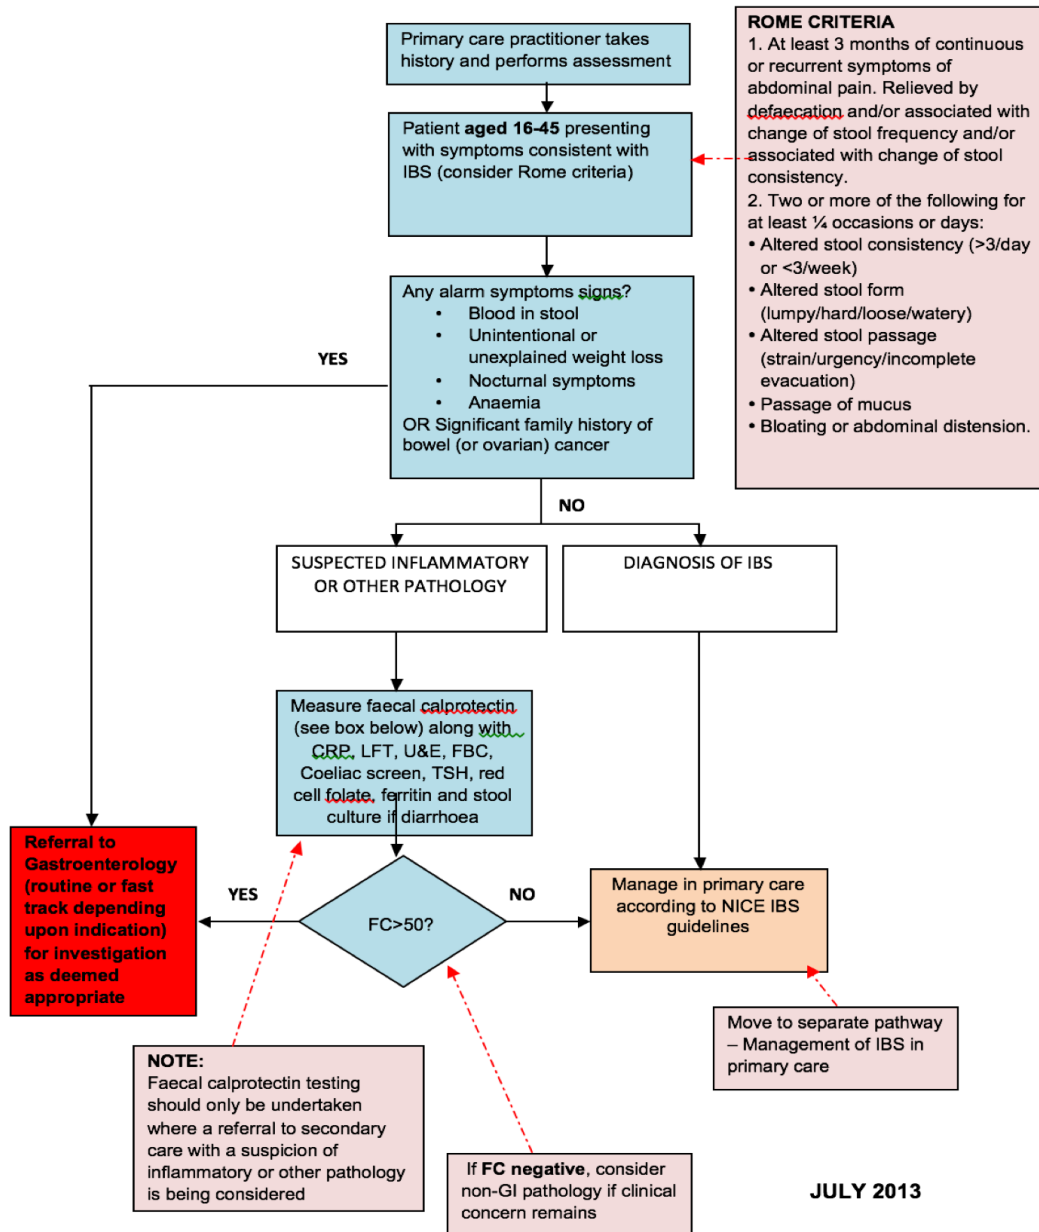

## Appendix II

### MANAGEMENT OF IRRITABLE BOWEL SYNDROME IN PRIMARY CARE

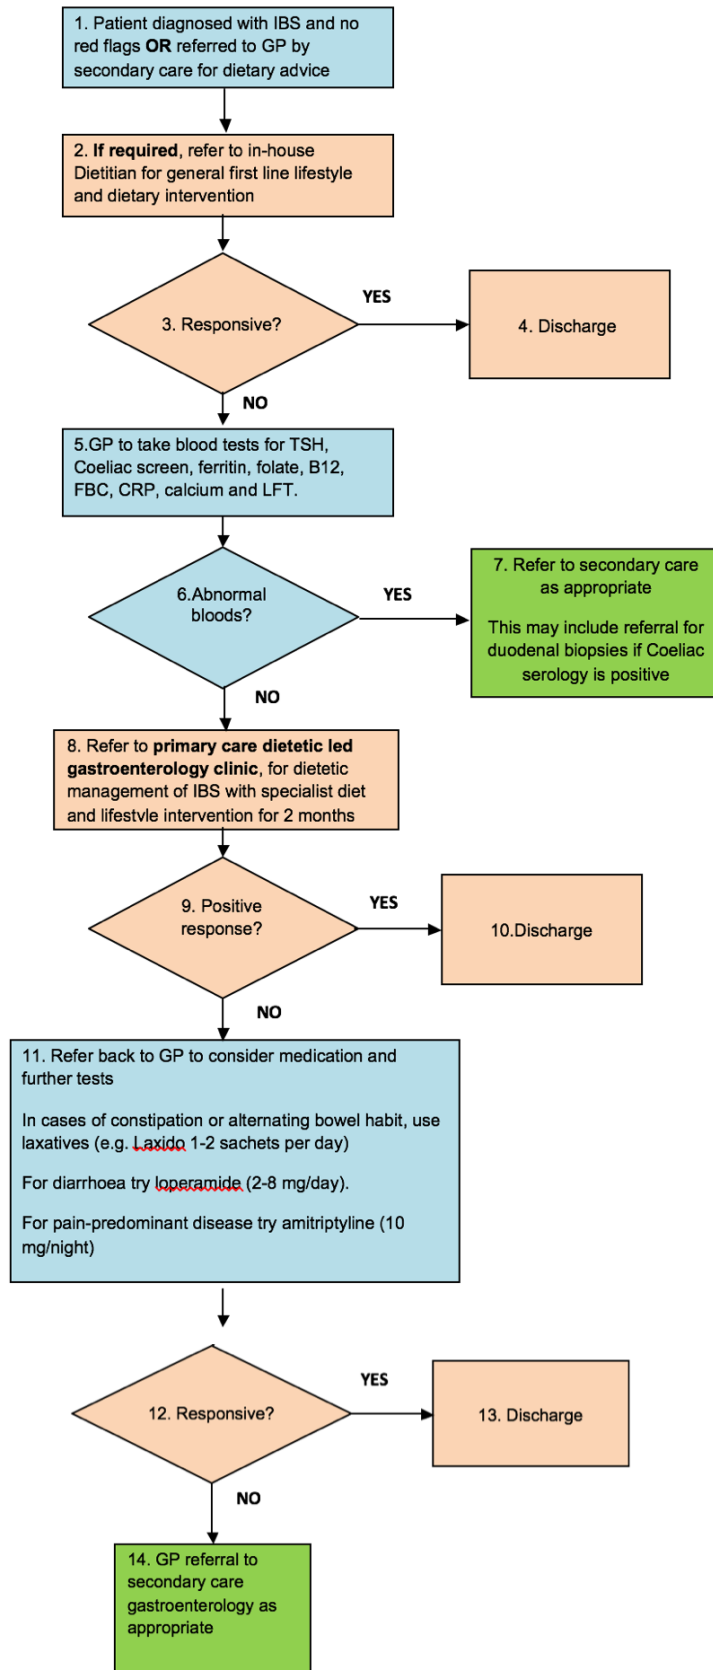

Supplement: flgastro-2016-100727supp_appendices.pdf [file flgastro-2016-100727supp_appendices.pdf]
