# Supplementary material
Source: PubMed Central journal article supplement (PMC5369501)
Supplement: flgastro-2016-100727supp_files.pdf [file flgastro-2016-100727supp_files.pdf]

## Supplementary File 1:

Audit data for new outpatient attendances May 2011 at Taunton and Somerset NHS Foundation Trust

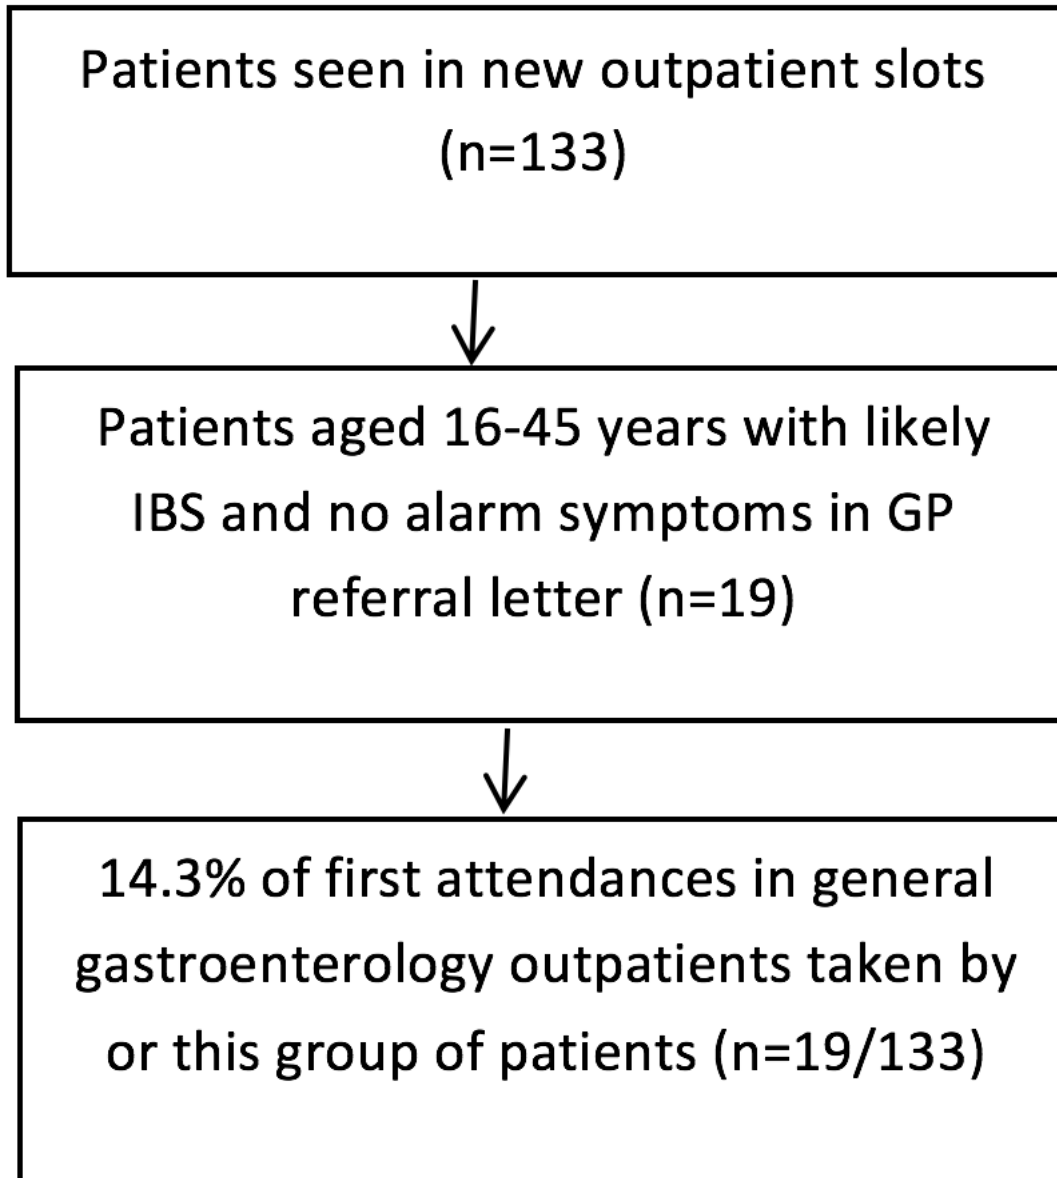

Supplementary File 2 - Alarm symptoms signs used in this study

| <b>Alarm symptoms</b>                                 |
|-------------------------------------------------------|
| Blood in stool                                        |
| Unintentional or unexplained weight loss              |
| Nocturnal symptoms                                    |
| Anaemia                                               |
| Significant family history of bowel or ovarian cancer |

Supplementary File 3 - Costing figures based on May 2011 Secondary Care audit data from Taunton and Somerset NHS Foundation Trust

| <b>Costing figures based on May 2011 Secondary Care Audit Data from Taunton and Somerset NHS Foundation Trust</b>                                                                               |               |
|-------------------------------------------------------------------------------------------------------------------------------------------------------------------------------------------------|---------------|
| 2010-11 number of first Gastroenterology OP attendances where source of referral is GP for <b>Taunton and Somerset NHS Foundation Trust and Yeovil District NHS Foundation Trust</b> (SUS data) | 1992 patients |
| Number of patients aged 16-45 years with no red flag symptoms and likely IBS based on Taunton and Somerset NHS Foundation Trust audit result of 14.3% of first OP attendances per annum         | 285 patients  |
| Average cost of first OP appointment with gastroenterology and investigations arising calculated per patient                                                                                    | £565.75       |
| Total secondary care costs for 285 patients                                                                                                                                                     | £161,198      |
